# Supplementary material for: Efficient screening of groundwater head monitoring data for anthropogenic effects and measurement errors
Source: Copernicus journal article supplement (doi:10.5194/hess-2019-287), 2019-07-09
Supplement: Supplementary file 1 [file hess-2019-287-supplement.pdf]

1995

2000

2005

2010

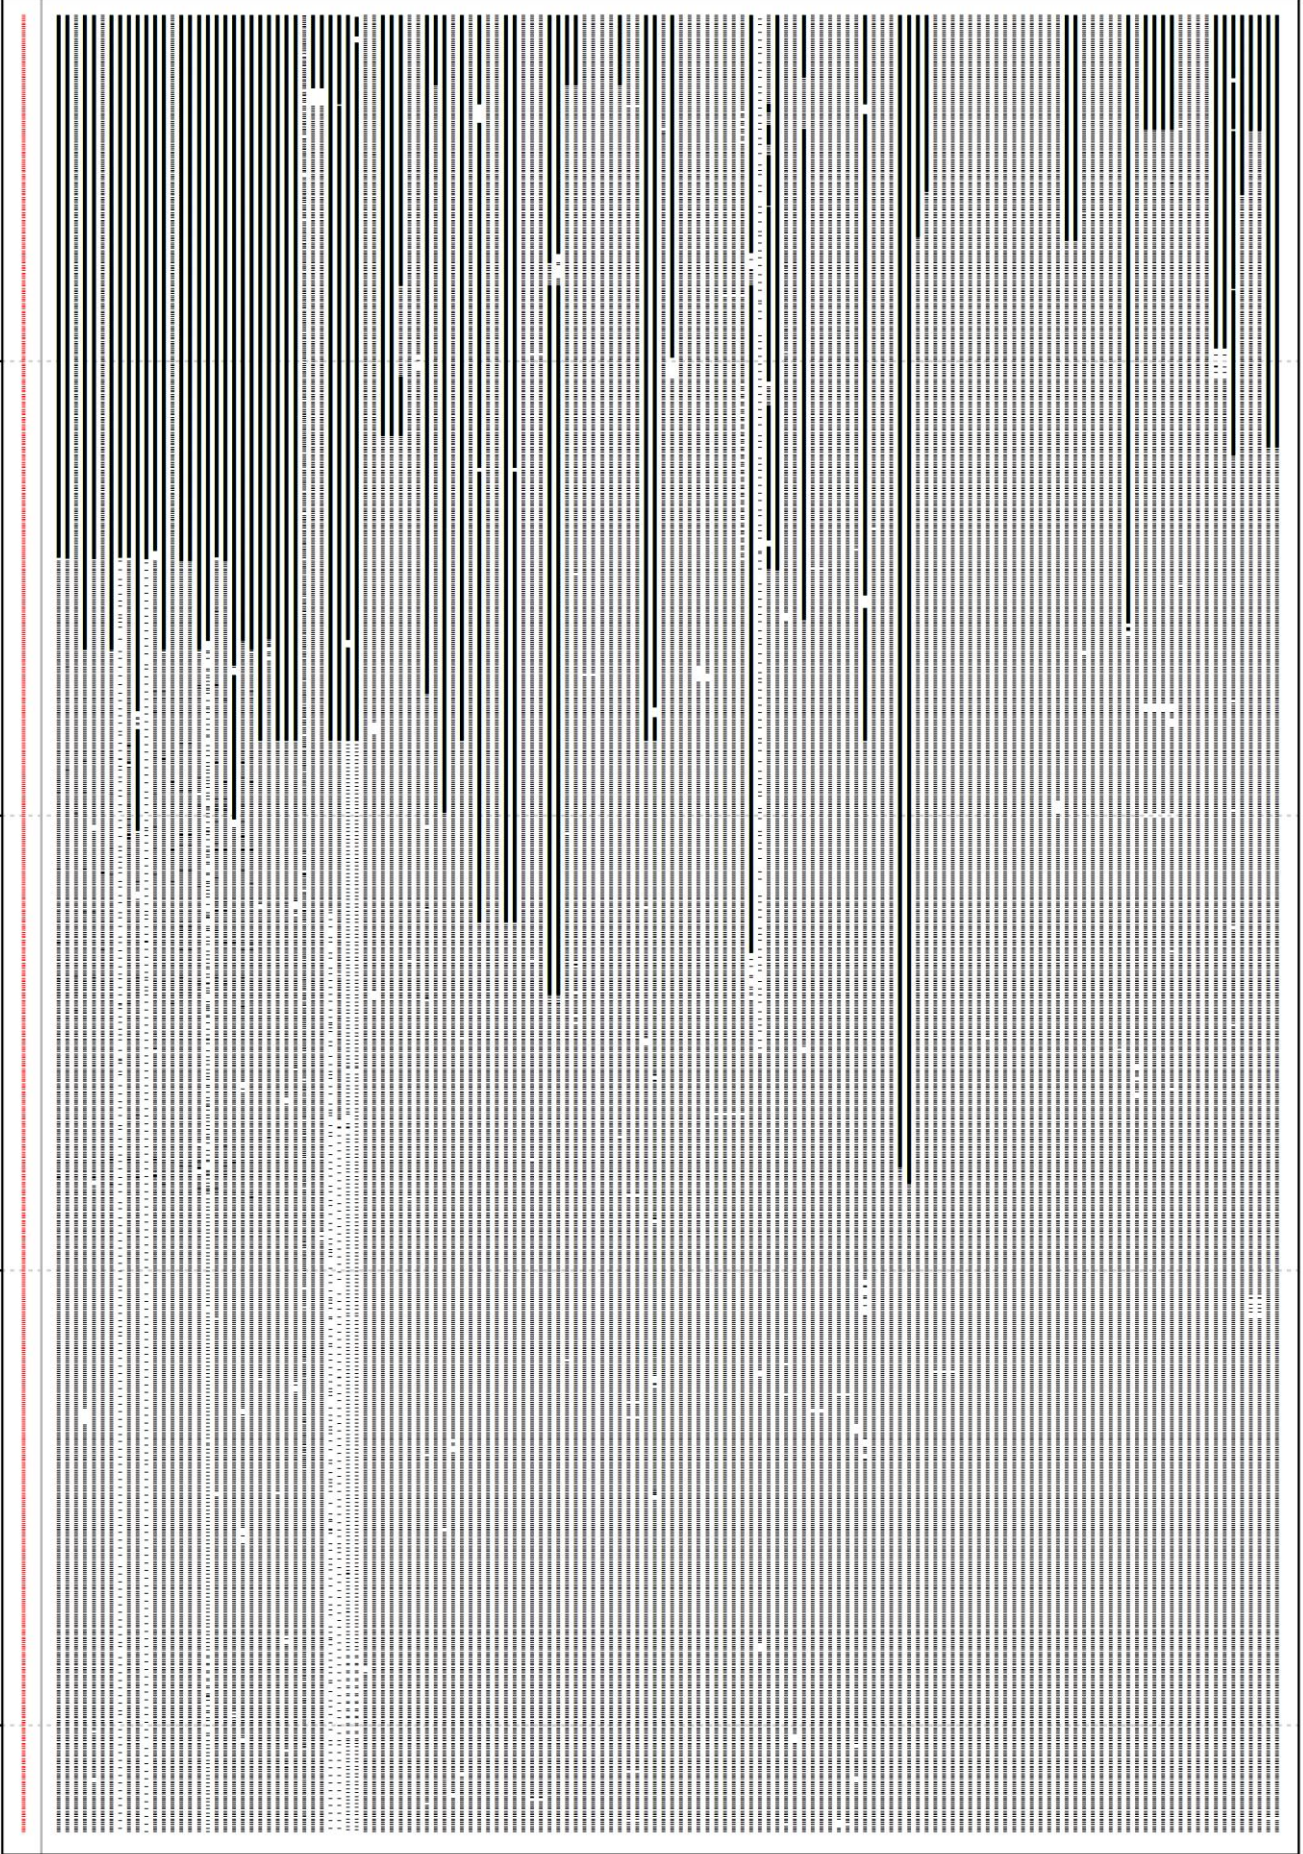

**Figure S1** Dates of reading of groundwater head of the selection of the 141 groundwater head series before interpolation. The red dates left of the solid grey line show the quasi-weekly measurement dates which are used for the groundwater head series after linear interpolation.

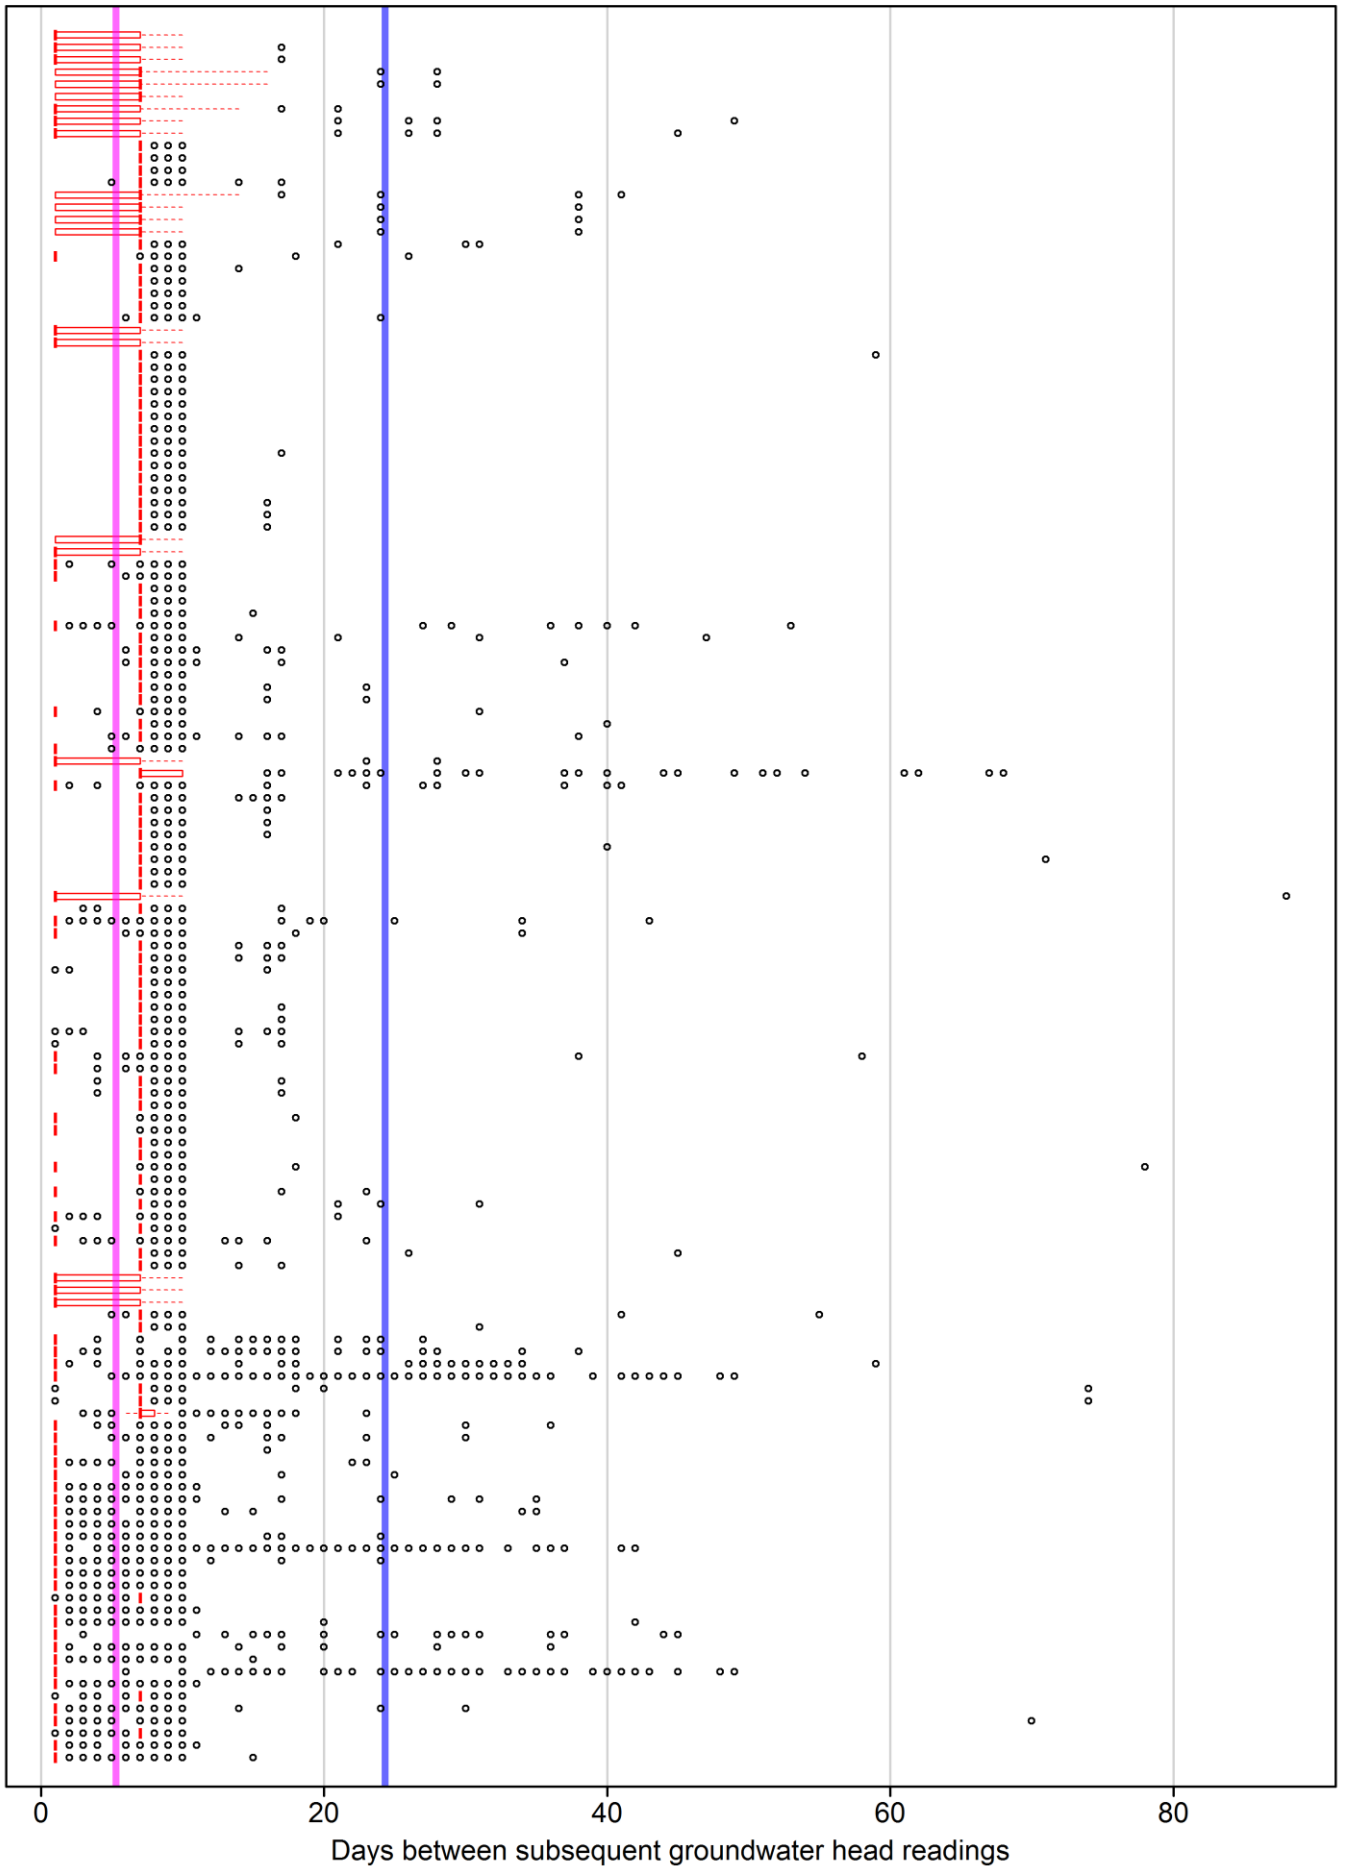

5

Figure S2 Red: Boxplots of the number of days between subsequent readings in the 141 observed groundwater head series before the interpolation. Black circles: Outliers. Blue solid line: mean of the maxima of measurement intervals of all series. Magenta solid line: mean of the mean of measurement intervals of all series.
