# Supplementary material for: Efficient screening of groundwater head monitoring data for anthropogenic effects and measurement errors
Source: Copernicus journal article supplement (doi:10.5194/hess-2019-287), 2019-07-09
Supplement: Supplementary file [file hess-2019-287-AC5-supplement.pdf]

During the work on the comments of Referee 2 we discovered one detail we would like to change to improve the clarity of the used terms at the beginning of the manuscript. In the introduction in lines 108+109 we extended the wording similar to lines 18+19 in the abstract:

“The reference hydrograph of an observation well describes the expected “normal” behaviour at that well, i.e. the part of the observed hydrograph which is considered typical for the monitored region.”
